# Supplementary material for: Site specific parameterizations of longwave radiation
Source: Copernicus journal article supplement (doi:10.5194/hess-2016-227), 2016-05-31
Supplement: Supplementary file [file hess-2016-227-AC4-supplement.pdf]

---

---

| <b>Model: 1</b>   |          |          |          |
|-------------------|----------|----------|----------|
| <b>STATION ID</b> | <b>X</b> | <b>Y</b> | <b>Z</b> |
| 8                 | 0.93     | 0.18     | -0.07    |
| 11                | 1.03     | 0.50     | -0.21    |
| 22                | 0.90     | 0.21     | -0.23    |
| 24                | 0.93     | 0.54     | -0.41    |
| 30                | 0.90     | 0.27     | -0.34    |
| 37                | 0.99     | 0.36     | -0.17    |
| 38                | 0.93     | 0.29     | -0.41    |
| 39                | 1.01     | 0.46     | -0.33    |
| 41                | 1.00     | 0.40     | -0.13    |
| 44                | 1.01     | 0.27     | -0.14    |
| 46                | 0.95     | 0.38     | -0.28    |
| 54                | 0.98     | 0.44     | -0.36    |
| 55                | 1.17     | 0.48     | -0.14    |
| 62                | 1.00     | 0.33     | -0.23    |
| 66                | 1.00     | 0.28     | -0.17    |
| 75                | 0.96     | 0.38     | -0.22    |
| 86                | 0.93     | 0.31     | -0.40    |
| 100               | 1.06     | 0.55     | -0.27    |
| 101               | 1.08     | 0.43     | -0.14    |
| 102               | 1.16     | 0.36     | -0.08    |
| 107               | 0.90     | 0.26     | -0.13    |
| 126               | 0.97     | 0.32     | -0.23    |
| 129               | 0.90     | 0.27     | -0.26    |
| 132               | 0.89     | 0.17     | -0.38    |

---

---

---

---

| <b>Model: 2</b>   |          |          |
|-------------------|----------|----------|
| <b>STATION ID</b> | <b>X</b> | <b>Y</b> |
| 8                 | 0.65     | 0.14     |
| 11                | 0.44     | 0.28     |
| 22                | 0.57     | 0.16     |
| 24                | 0.58     | 0.18     |
| 30                | 0.48     | 0.27     |
| 37                | 0.49     | 0.31     |
| 38                | 0.47     | 0.32     |
| 39                | 0.43     | 0.33     |
| 41                | 0.52     | 0.22     |
| 44                | 0.60     | 0.10     |
| 46                | 0.62     | 0.16     |
| 54                | 0.61     | 0.17     |
| 55                | 0.61     | 0.17     |
| 62                | 0.53     | 0.23     |
| 66                | 0.66     | 0.11     |
| 75                | 0.61     | 0.20     |
| 86                | 0.59     | 0.17     |
| 100               | 0.72     | 0.10     |
| 101               | 0.69     | 0.13     |
| 102               | 0.59     | 0.21     |
| 107               | 0.71     | 0.13     |
| 126               | 0.62     | 0.19     |
| 129               | 0.60     | 0.19     |
| 132               | 0.67     | 0.11     |

---

---

---

---

**Model: 3**

---

---

| <b>STATION ID</b> | <b>X</b> |
|-------------------|----------|
| 8                 | 5.16     |
| 11                | 4.44     |
| 22                | 5.00     |
| 24                | 5.24     |
| 30                | 4.28     |
| 37                | 4.85     |
| 38                | 4.70     |
| 39                | 4.42     |
| 41                | 5.93     |
| 44                | 4.18     |
| 46                | 5.20     |
| 54                | 5.22     |
| 55                | 5.22     |
| 62                | 4.69     |
| 66                | 4.75     |
| 75                | 4.77     |
| 86                | 5.03     |
| 100               | 5.19     |
| 101               | 4.72     |
| 102               | 4.68     |
| 107               | 5.30     |
| 126               | 4.34     |
| 129               | 5.70     |
| 132               | 4.40     |

---

---

| <b>Model: 4</b>   |          |          |
|-------------------|----------|----------|
| <b>STATION ID</b> | <b>X</b> | <b>Y</b> |
| 8                 | 0.25     | -6.99    |
| 11                | 0.43     | -3.86    |
| 22                | 0.37     | -10.59   |
| 24                | 0.33     | -7.86    |
| 30                | 0.30     | -2.11    |
| 37                | 0.38     | -6.94    |
| 38                | 0.38     | -6.08    |
| 39                | 0.41     | -5.08    |
| 41                | 0.36     | -13.19   |
| 44                | 0.33     | -2.83    |
| 46                | 0.30     | -8.00    |
| 54                | 0.30     | -14.85   |
| 55                | 0.30     | -14.81   |
| 62                | 0.39     | -4.74    |
| 66                | 0.32     | -6.47    |
| 75                | 0.28     | -4.01    |
| 86                | 0.31     | -6.37    |
| 100               | 0.21     | -8.14    |
| 101               | 0.24     | -3.43    |
| 102               | 0.29     | -3.58    |
| 107               | 0.22     | -8.53    |
| 126               | 0.25     | -1.90    |
| 129               | 0.28     | -14.98   |
| 132               | 0.24     | -1.81    |

| <b>Model: 5</b>   |          |          |
|-------------------|----------|----------|
| <b>STATION ID</b> | <b>X</b> | <b>Y</b> |
| 8                 | 1.62     | 11.50    |
| 11                | 1.69     | 9.84     |
| 22                | 1.52     | 6.45     |
| 24                | 1.64     | 5.45     |
| 30                | 1.74     | 9.98     |
| 37                | 1.77     | 2.39     |
| 38                | 1.77     | 6.84     |
| 39                | 1.72     | 6.38     |
| 41                | 1.83     | 4.52     |
| 44                | 1.49     | 10.36    |
| 46                | 1.75     | 7.00     |
| 54                | 1.58     | 5.39     |
| 55                | 1.58     | 8.47     |
| 62                | 1.67     | 4.71     |
| 66                | 1.70     | 6.59     |
| 75                | 1.78     | 10.83    |
| 86                | 1.65     | 3.79     |
| 100               | 1.62     | 8.53     |
| 101               | 1.57     | 3.99     |
| 102               | 1.79     | 8.87     |
| 107               | 1.70     | 4.67     |
| 126               | 1.84     | 8.40     |
| 129               | 1.72     | 2.82     |
| 132               | 1.59     | 8.95     |

| <b>Model: 6</b>   |          |          |
|-------------------|----------|----------|
| <b>STATION ID</b> | <b>X</b> | <b>Y</b> |
| 8                 | 0.70     | 4.35     |
| 11                | 0.54     | 12.08    |
| 22                | 0.65     | 3.24     |
| 24                | 0.63     | 6.58     |
| 30                | 0.60     | 12.17    |
| 37                | 0.59     | 14.00    |
| 38                | 0.58     | 14.00    |
| 39                | 0.55     | 14.00    |
| 41                | 0.67     | 5.40     |
| 44                | 0.63     | 4.65     |
| 46                | 0.68     | 5.50     |
| 54                | 0.65     | 7.05     |
| 55                | 0.65     | 7.04     |
| 62                | 0.60     | 9.96     |
| 66                | 0.71     | 2.56     |
| 75                | 0.68     | 8.36     |
| 86                | 0.65     | 6.09     |
| 100               | 0.75     | 3.43     |
| 101               | 0.72     | 6.16     |
| 102               | 0.66     | 9.89     |
| 107               | 0.75     | 5.08     |
| 126               | 0.84     | 0.03     |
| 129               | 0.67     | 6.48     |
| 132               | 0.70     | 4.77     |

| <b>Model: 7</b>   |          |          |
|-------------------|----------|----------|
| <b>STATION ID</b> | <b>X</b> | <b>Y</b> |
| 8                 | -83.39   | 1.02     |
| 11                | -104.32  | 0.89     |
| 22                | -84.81   | 0.94     |
| 24                | -146.55  | 1.12     |
| 30                | -46.26   | 0.84     |
| 37                | -93.56   | 0.92     |
| 38                | -79.48   | 0.88     |
| 39                | -67.42   | 0.81     |
| 41                | -196.54  | 1.29     |
| 44                | -5.37    | 0.70     |
| 46                | -167.34  | 1.18     |
| 54                | -56.46   | 0.90     |
| 55                | -55.00   | 0.89     |
| 62                | -109.60  | 0.95     |
| 66                | -52.33   | 0.89     |
| 75                | -65.59   | 0.93     |
| 86                | -119.59  | 1.06     |
| 100               | -55.82   | 0.98     |
| 101               | -19.76   | 0.85     |
| 102               | -76.26   | 0.93     |
| 107               | -79.62   | 1.03     |
| 126               | 3.67     | 0.77     |
| 129               | -134.69  | 1.16     |
| 132               | 5.91     | 0.77     |

| <b>Model: 8</b>   |          |          |
|-------------------|----------|----------|
| <b>STATION ID</b> | <b>X</b> | <b>Y</b> |
| 8                 | 0.237    | 0.828    |
| 11                | 0.002    | 0.957    |
| 22                | 0.038    | 1.020    |
| 24                | 0.001    | 1.125    |
| 30                | 0.385    | 0.488    |
| 37                | 0.112    | 0.893    |
| 38                | 0.001    | 2.045    |
| 39                | 0.002    | 0.963    |
| 41                | 0.208    | 0.985    |
| 44                | 0.494    | 0.300    |
| 46                | 0.585    | 0.610    |
| 54                | 0.155    | 0.921    |
| 55                | 0.155    | 0.921    |
| 62                | 0.007    | 0.999    |
| 66                | 0.364    | 0.567    |
| 75                | 0.247    | 0.741    |
| 86                | 0.065    | 1.010    |
| 100               | 0.438    | 0.583    |
| 101               | 0.383    | 0.584    |
| 102               | 0.368    | 0.580    |
| 107               | 0.429    | 0.631    |
| 126               | 0.319    | 1.245    |
| 129               | 0.312    | 1.339    |
| 132               | 0.679    | 0.191    |



---

---

**Model: 9**

---

---

| <b>STATION ID</b> | <b>X</b> | <b>Y</b> | <b>Z</b> |
|-------------------|----------|----------|----------|
| 8                 | 4.98     | 10.87    | 0.58     |
| 11                | 2.98     | 5.07     | 0.80     |
| 22                | 5.87     | 8.99     | 0.56     |
| 24                | 1.89     | 6.00     | 0.74     |
| 30                | 1.48     | 5.96     | 0.72     |
| 37                | 1.00     | 0.34     | 0.12     |
| 38                | 3.00     | 4.79     | 0.98     |
| 39                | 2.96     | 4.47     | 0.92     |
| 41                | 0.30     | 5.76     | 0.70     |
| 44                | 1.90     | 5.77     | 0.68     |
| 46                | 2.36     | 6.13     | 0.75     |
| 54                | 2.86     | 5.96     | 0.86     |
| 55                | 2.87     | 5.96     | 0.89     |
| 62                | 2.97     | 5.75     | 0.80     |
| 66                | 2.24     | 5.39     | 0.79     |
| 75                | 1.88     | 5.96     | 0.90     |
| 86                | 1.71     | 5.74     | 0.76     |
| 100               | 0.44     | 5.91     | 0.81     |
| 101               | 1.05     | 5.53     | 0.89     |
| 102               | 2.22     | 5.94     | 0.93     |
| 107               | 2.55     | 8.58     | 0.86     |
| 126               | 0.62     | 5.95     | 0.79     |
| 129               | 1.71     | 5.99     | 0.82     |
| 132               | 6.24     | 11.28    | 0.60     |

---

---

| <b>Model: 10</b>  |          |          |          |
|-------------------|----------|----------|----------|
| <b>STATION ID</b> | <b>X</b> | <b>Y</b> | <b>Z</b> |
| 8                 | 38.63    | 171.71   | 42.03    |
| 11                | 6.63     | 110.53   | 174.48   |
| 22                | 2.14     | 186.44   | 30.32    |
| 24                | 29.01    | 132.73   | 108.33   |
| 30                | 0.46     | 150.74   | 96.12    |
| 37                | 0.21     | 148.45   | 127.18   |
| 38                | 0.06     | 134.58   | 151.82   |
| 39                | 0.06     | 125.35   | 158.33   |
| 41                | 0.07     | 120.76   | 154.09   |
| 44                | 53.08    | 105.03   | 105.85   |
| 46                | 0.09     | 188.01   | 69.27    |
| 54                | 55.34    | 123.33   | 99.19    |
| 55                | 56.01    | 122.24   | 100.27   |
| 62                | 0.68     | 150.39   | 95.12    |
| 66                | 37.64    | 182.26   | 4.69     |
| 75                | 39.45    | 154.46   | 79.96    |
| 86                | 33.62    | 135.85   | 97.63    |
| 100               | 78.32    | 112.74   | 103.41   |
| 101               | 62.08    | 147.42   | 68.12    |
| 102               | 24.13    | 152.75   | 96.77    |
| 107               | 73.65    | 132.25   | 100.46   |
| 126               | 17.84    | 161.27   | 71.43    |
| 129               | 15.71    | 159.41   | 89.76    |
| 132               | 74.09    | 97.62    | 128.17   |
